# Supplementary material for: Living with a leaky skin: upregulation of ion transport proteins during sloughing
Source: Oxford University Press journal article supplement (doi:10.1242/jeb.151738), 2017-05-31
Supplement: jeb151738supp.pdf [file jeb151738supp.pdf]

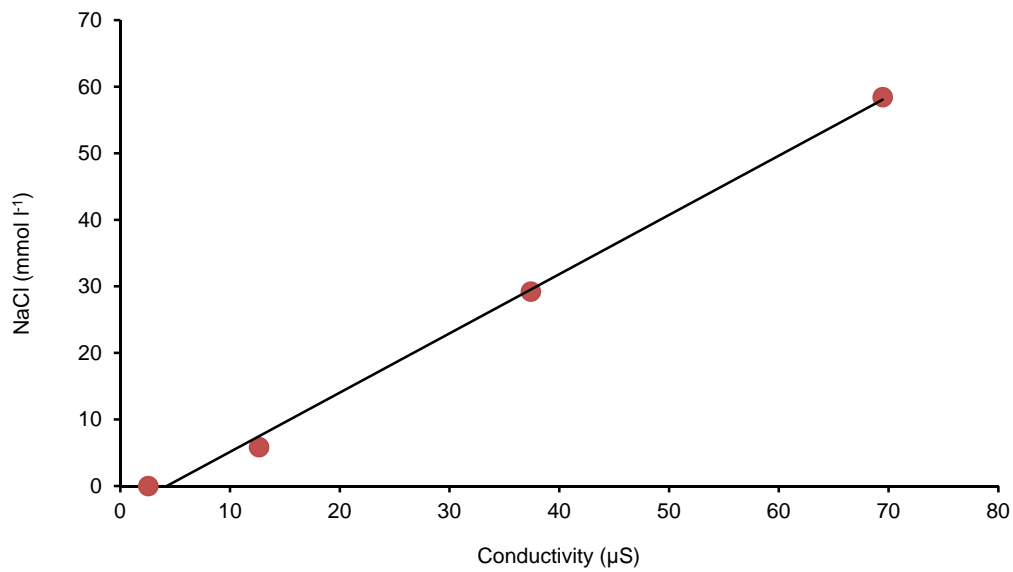

**Fig. S1.** Relationship between conductivity readings ( $G$ ,  $\mu\text{S}$ ) and known NaCl ( $c_i$ ,  $\text{mmol l}^{-1}$ ) concentrations show a predictable linear relationship ( $c_i = 0.015 \times G - 0.064$ ,  $r^2 = 0.99$ ).

The RO only solution and solutions where the animal was in the intermoult phase did not have any detectable sodium or potassium.
